# Supplementary material for: Proton Gradient-Dependent Transport of p-Glucocoumaryl Alcohol in Differentiating Xylem of Woody Plants
Source: PubMed Central journal article supplement (PMC6586893; doi:10.1038/s41598-019-45394-7), 2019-06-20
Supplement: 41598_2019_45394_MOESM1_ESM.pdf [file 41598_2019_45394_MOESM1_ESM.pdf]

# **Proton Gradient-Dependent Transport of *p*-Glucocoumaryl Alcohol in Differentiating Xylem of Woody Plants**

**Taku Tsuyama<sup>1\*</sup>, Yasuyuki Matsushita<sup>2</sup>, Kazuhiko Fukushima<sup>2</sup>, Keiji Takabe<sup>3</sup>,  
Kazufumi Yazaki<sup>4</sup>, Ichiro Kamei<sup>1</sup>**

<sup>1</sup>Faculty of Agriculture, University of Miyazaki, Miyazaki 889-2192, Japan

<sup>2</sup>Graduate School of Bioagricultural Sciences, Nagoya University, Nagoya 464-8601,  
Japan

<sup>3</sup>Graduate School of Agriculture, Kyoto University, Kyoto 606-8502, Japan

<sup>4</sup>Research Institute for Sustainable Humanosphere, Kyoto University, Uji 611-0011,  
Japan

## **\*Corresponding Author:**

T. Tsuyama

Faculty of Agriculture, University of Miyazaki, 1-1 Gakuen-kibanadai-nishi, Miyazaki  
889-2192, Japan

Tel.: 81-985-58-7182 Fax: 81-985-58-7182 E-mail: tsuyama@cc.miyazaki-u.ac.jp

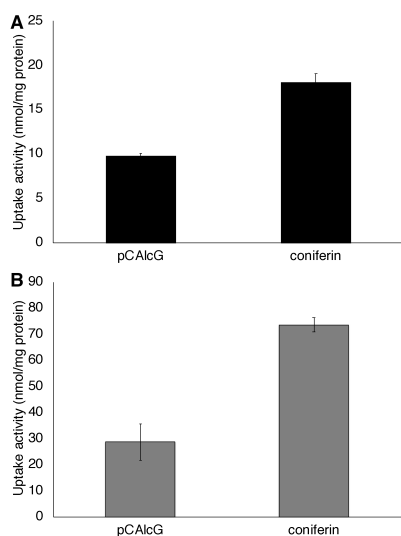

**Figure S1.** Uptake of lignin precursors into membrane vesicles obtained from differentiating xylem of hybrid poplar (*Populus sieboldii* × *P. grandidentata*) (A), Japanese cypress (*Chamaecyparis obtusa*) (B), respectively. Membrane vesicles were incubated with 50  $\mu$ M of each compound in the presence of 5 mM ATP for 20 min. pCAlcG; *p*-glucocoumaryl alcohol. Data are means  $\pm$  SD of three replicates.

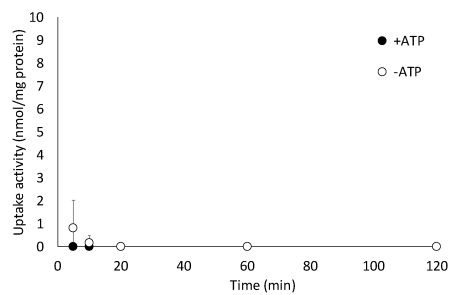

**Figure S2.** A time course of *p*-coumaryl alcohol uptake in hybrid poplar membrane vesicles. Membrane vesicles were incubated with 50  $\mu$ M of *p*-coumaryl alcohol in the presence (●) or absence (○) of 5 mM Mg/ATP. Data are means  $\pm$  SD of three replicates.

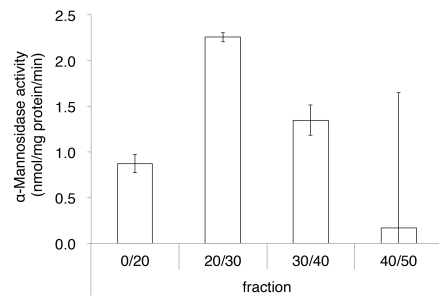

**Figure S3.** Alfa-mannosidase activity in sucrose gradient-fractions of hybrid poplar was used as a marker of central vacuole<sup>24</sup>. Membrane fractions were incubated with 5 mM *p*-nitrophenyl- $\alpha$ -D-mannopyranoside in 100 mM sodium citrate buffer (pH 4.6) for 1 h, followed by measurements of absorbance at 400 nm for determination of liberated *p*-nitrophenol. Data are means  $\pm$  SD of three replicates.

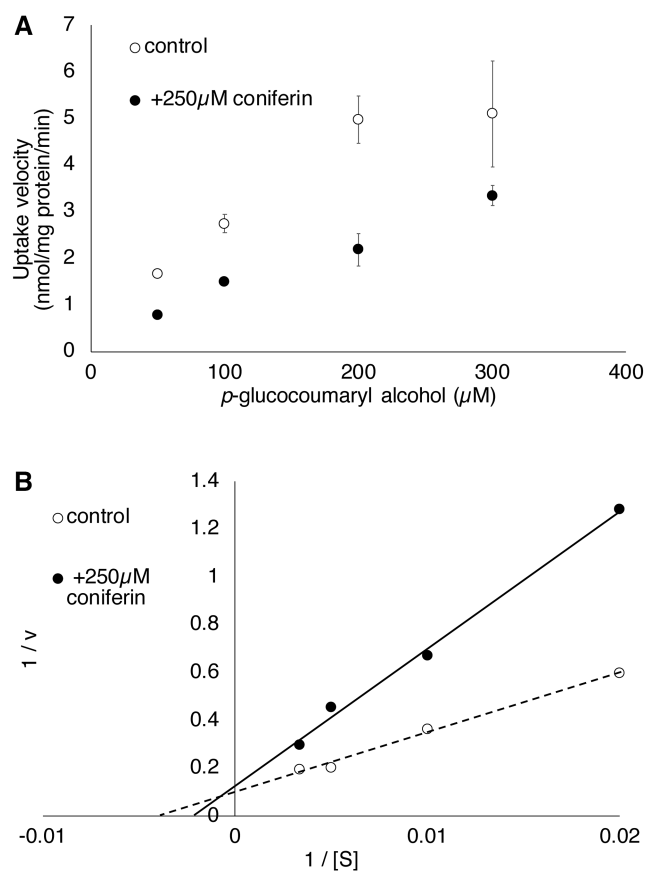

**Figure S4.** Mixed-inhibition of *p*-glucocoumaroyl alcohol transport by coniferin. (A), Membrane fractions of hybrid poplar were incubated for 5 min in the presence of 5 mM Mg/ATP and each concentration of *p*-glucocoumaroyl alcohol with ( $\bullet$ ) or without ( $\circ$ ) 250  $\mu\text{M}$  coniferin. Data are means of three replicates. (B), Lineweaver-Burk plots of results in (A). Calculated apparent  $K_m$  values were 256  $\mu\text{M}$  (control) or 451  $\mu\text{M}$  (+250  $\mu\text{M}$  coniferin) and calculated  $V_{\max}$  values were 10.14  $\text{nmol} \cdot \text{mg protein}^{-1} \cdot \text{min}^{-1}$  (control) or 7.86  $\text{nmol} \cdot \text{mg protein}^{-1} \cdot \text{min}^{-1}$  (+250  $\mu\text{M}$  coniferin).

**Table S1.  $K_m$  values of the *p*-glucocoumaryl alcohol uptake for comparison with respect to secondary transporters**

| Compounds                               | plant species               | $K_m$                     |
|-----------------------------------------|-----------------------------|---------------------------|
| <i>p</i> -glucocoumaryl alcohol         | hybrid poplar               | 160-260 $\mu\text{M}^*$   |
| coniferin                               | hybrid poplar               | 60-80 $\mu\text{M}^{16}$  |
| coniferin                               | Japanese cypress            | 24-26 $\mu\text{M}^{16}$  |
| isovitexin                              | barley                      | 82 $\mu\text{M}^{19}$     |
| saponin                                 | barley, <i>Arabidopsis</i>  | 50–100 $\mu\text{M}^{20}$ |
| salicylic acid 2- <i>O</i> -D-glucoside | tobacco                     | 11 $\mu\text{M}^{21}$     |
| berberine                               | <i>Coptis japonica</i>      | 43.7 $\mu\text{M}^{22}$   |
| salicylic acid glucose ester            | <i>Arabidopsis thaliana</i> | 38 $\mu\text{M}^{23}$     |

\* , present study.
